# Supplementary material for: Contrasting Suitability and Ambition in Regional Carbon Mitigation
Source: Research Square preprint supplement (doi:10.21203/rs.3.rs-242383/v1), 2021-03-16
Supplement: Supplementary file 3 [file 86ddcd6c7d757d0e399be5d0.xlsx]

## Sheet: RSM
	SCENARIO	SCC(US$ 2014)	RCC(US$ 2014)	SCC-83.3%	SCC-16.7%	RCC-max	RCC-min	SCC(harmonized)	RCC(harmonized)	RSM	RCC-ranking	RSM-ranking	RCC-ranking for 2030
Australia	SSP1-RCP4.5	4.68831	32.647	8.37999	1.89745	46.0147	19.4155	0.0828053	0.310406	0.266765	10	16	14
Brazil	SSP1-RCP4.5	16.9064	104.665	28.7822	10.0216	148.267	49.6444	0.132264	0.486373	0.271938	5	15	1
Canada	SSP1-RCP4.5	-8.13679	32.8114	-5.32288	-11.1181	43.0596	21.5089	0.0308898	0.310807	0.0993856	9	24	12
Central Asia	SSP1-RCP4.5	-0.503614	17.914	0.270864	-1.1861	20.3927	13.6651	0.0617886	0.274407	0.225171	15	18	22
China	SSP1-RCP4.5	21.3454	-6.77465	42.7341	4.50682	11.04	-68.0239	0.150232	0.214083	0.701747	24	4	24
European Union	SSP1-RCP4.5	-14.3224	115.642	9.32615	-36.1763	150.21	76.1069	0.00585072	0.513195	0.0114006	1	26	3
India	SSP1-RCP4.5	58.0276	-5.01716	103.785	34.5004	10.6668	-53.169	0.298721	0.218378	1.36791	23	2	23
Japan	SSP1-RCP4.5	5.45082	105.929	11.9257	0.45448	132.059	73.3702	0.0858919	0.489461	0.175483	4	21	4
Korea, Republic of	SSP1-RCP4.5	-0.946027	-18.3054	1.14605	-2.79283	40.4822	-208.149	0.0599977	0.185909	0.322725	25	13	10
Malaysia	SSP1-RCP4.5	6.39246	14.7046	11.1336	3.79667	41.0788	3.5664	0.0897036	0.266565	0.336516	17	11	20
Mexico	SSP1-RCP4.5	8.88521	111.896	14.8061	4.91008	137.899	90.0285	0.0997942	0.504041	0.197988	3	20	5
Rest of Central America	SSP1-RCP4.5	4.43568	25.9109	7.59136	2.625	56.6195	-8.88773	0.0817827	0.293947	0.278223	11	14	9
Rest of East Asia	SSP1-RCP4.5	-0.115205	15.4877	-0.0894732	-0.145811	26.2197	-4.3429	0.0633609	0.268479	0.235999	16	17	13
Rest of Europe	SSP1-RCP4.5	-2.70062	5.04907	-1.63197	-3.86761	45.4653	-25.6466	0.0528952	0.242973	0.2177	20	19	11
Rest of North Africa	SSP1-RCP4.5	8.3677	13.5976	13.56	4.77416	22.9076	8.67422	0.0976994	0.263861	0.370269	18	10	21
Rest of Oceania	SSP1-RCP4.5	0.183513	59.963	0.464191	-0.0398345	79.3612	35.9515	0.0645701	0.377149	0.171206	7	22	7
Rest of South America	SSP1-RCP4.5	13.1199	51.1621	23.9915	6.66583	72.3807	28.6419	0.116936	0.355645	0.3288	8	12	6
Rest of South Asia	SSP1-RCP4.5	8.54007	0.606481	14.2934	5.03591	17.5036	-46.5181	0.0983971	0.232118	0.423909	22	9	18
Rest of Southeast Asia	SSP1-RCP4.5	15.8642	5.72513	25.4144	9.93304	17.0323	-20.0622	0.128045	0.244625	0.523434	19	6	16
Rest of Sub-Saharan Africa	SSP1-RCP4.5	25.2362	19.0773	44.6359	14.6816	33.937	8.53143	0.165982	0.27725	0.598674	13	5	17
Rest of the World	SSP1-RCP4.5
Rest of Western Asia	SSP1-RCP4.5	72.6971	3.91247	129.785	39.1265	12.8007	-1.70242	0.358103	0.240196	1.49088	21	1	25
Russian Federation	SSP1-RCP4.5	-9.40585	65.4862	-6.61939	-12.5785	94.3775	40.5768	0.0257527	0.390644	0.0659236	6	25	8
Switzerland	SSP1-RCP4.5	-1.05135	113.792	-0.568217	-1.58745	146.86	73.872	0.0595714	0.508674	0.117111	2	23	2
Thailand	SSP1-RCP4.5	6.67329	-21.1163	12.312	3.90462	1.43903	-91.5172	0.0908404	0.179041	0.507371	26	8	26
United Arab Emirates	SSP1-RCP4.5	19.2799	18.2617	35.7072	11.0504	29.5285	12.0555	0.141871	0.275257	0.515414	14	7	15
United States of America	SSP1-RCP4.5	46.9516	21.5656	109.64	2.61927	27.7232	14.5894	0.253886	0.283329	0.896079	12	3	19
Australia	SSP1-RCP6.0	4.62384	18.7305	8.30099	1.8949	20.9796	15.713	0.0825443	0.276402	0.298638	11	13	21
Brazil	SSP1-RCP6.0	16.4179	92.5426	27.463	9.7817	146.539	26.8716	0.130286	0.456753	0.285244	2	15	4
Canada	SSP1-RCP6.0	-8.43743	21.4821	-5.55714	-11.3111	24.8773	19.7141	0.0296728	0.283125	0.104804	10	24	14
Central Asia	SSP1-RCP6.0	-0.535883	14.3837	0.221675	-1.19059	16.7876	12.9001	0.061658	0.265781	0.231987	17	16	26
China	SSP1-RCP6.0	20.1116	8.63696	41.1572	3.47215	14.1868	4.16906	0.145238	0.25174	0.576937	22	5	25
European Union	SSP1-RCP6.0	-14.2117	75.7739	8.94056	-34.8648	84.3353	72.7429	0.00629872	0.415781	0.0151491	3	26	2
India	SSP1-RCP6.0	55.1002	6.2421	96.0328	33.3366	12.2662	1.63259	0.286871	0.245888	1.16667	23	2	24
Japan	SSP1-RCP6.0	5.16978	73.1973	11.6891	0.245656	80.1879	68.2821	0.0847543	0.409486	0.206977	5	18	3
Korea, Republic of	SSP1-RCP6.0	-1.04918	27.2626	1.01617	-2.93895	47.6955	10.7146	0.0595802	0.297249	0.200438	9	22	9
Malaysia	SSP1-RCP6.0	6.08559	5.38344	10.4398	3.64092	8.59749	3.35378	0.0884614	0.24379	0.362859	24	11	18
Mexico	SSP1-RCP6.0	8.44229	101.969	14.1527	4.69669	129.897	89.3199	0.0980013	0.479785	0.204261	1	20	5
Rest of Central America	SSP1-RCP6.0	4.01693	18.6431	6.76443	2.40847	53.8273	-15.7358	0.0800876	0.276189	0.289974	12	14	11
Rest of East Asia	SSP1-RCP6.0	-0.118529	17.4692	-0.0921889	-0.148378	24.6405	11.9452	0.0633474	0.27332	0.23177	14	17	12
Rest of Europe	SSP1-RCP6.0	-2.61881	11.0621	-1.6011	-3.69728	44.0231	-22.4897	0.0532264	0.257665	0.206572	19	19	8
Rest of North Africa	SSP1-RCP6.0	8.31738	12.3515	14.2598	4.68638	23.7961	8.84571	0.0974956	0.260816	0.37381	18	10	19
Rest of Oceania	SSP1-RCP6.0	0.178473	36.4225	0.45773	-0.0431565	43.5706	33.4367	0.0645497	0.319631	0.201951	8	21	7
Rest of South America	SSP1-RCP6.0	12.094	44.4415	21.155	6.19594	70.1352	19.1146	0.112783	0.339224	0.332474	6	12	10
Rest of South Asia	SSP1-RCP6.0	8.38936	10.569	14.4765	4.93282	18.6802	4.15576	0.097787	0.256461	0.381294	20	9	15
Rest of Southeast Asia	SSP1-RCP6.0	14.8813	10.0228	23.6154	9.40553	16.5112	4.90713	0.124066	0.255126	0.486294	21	7	13
Rest of Sub-Saharan Africa	SSP1-RCP6.0	24.17	18.1285	41.7144	14.089	35.6415	11.7121	0.161667	0.274931	0.588026	13	4	17
Rest of the World	SSP1-RCP6.0
Rest of Western Asia	SSP1-RCP6.0	72.2748	3.53336	135.291	38.3824	13.8887	0.0101387	0.356393	0.23927	1.4895	25	1	20
Russian Federation	SSP1-RCP6.0	-9.53309	42.1081	-6.76897	-12.4525	59.5003	24.4795	0.0252376	0.333523	0.0756698	7	25	6
Switzerland	SSP1-RCP6.0	-1.03574	74.2	-0.567148	-1.53374	84.3426	70.2857	0.0596345	0.411935	0.144767	4	23	1
Thailand	SSP1-RCP6.0	5.99842	-3.32896	10.6985	3.58383	4.15961	-10.2823	0.0881086	0.222503	0.395989	26	8	22
United Arab Emirates	SSP1-RCP6.0	19.4793	15.5366	37.2025	10.9758	29.7999	11.2394	0.142679	0.268598	0.531198	15	6	16
United States of America	SSP1-RCP6.0	44.2609	14.5609	107.33	0.592989	16.1693	13.8557	0.242994	0.266214	0.912775	16	3	23
Australia	SSP2-RCP4.5	5.14511	29.7457	9.31967	2.04755	34.9941	26.4878	0.0846544	0.303317	0.279096	9	15	11
Brazil	SSP2-RCP4.5	24.9397	88.5101	42.8881	14.3326	115.052	67.6726	0.164782	0.446901	0.368722	4	13	7
Canada	SSP2-RCP4.5	-7.96895	27.4608	-5.2057	-10.8374	31.7086	25.803	0.0315692	0.297734	0.106032	10	24	9
Central Asia	SSP2-RCP4.5	-0.609634	15.4272	0.345431	-1.44566	17.8051	12.3172	0.0613594	0.268331	0.228671	13	20	19
China	SSP2-RCP4.5	25.6979	-0.811294	51.4932	5.62121	0.857584	-2.58104	0.167851	0.228654	0.734084	21	5	23
European Union	SSP2-RCP4.5	-13.7088	97.2309	10.1012	-35.597	114.662	89.6868	0.00833451	0.468209	0.0178008	1	26	2
India	SSP2-RCP4.5	89.6443	-2.18508	166.179	51.3298	-1.09306	-4.34374	0.426704	0.225298	1.89396	23	2	22
Japan	SSP2-RCP4.5	5.78664	87.1879	12.7149	0.487382	102.241	80.6386	0.0872513	0.44367	0.196658	5	21	4
Korea, Republic of	SSP2-RCP4.5	-0.87254	-3.39312	1.053	-2.64385	1.05328	-10.7214	0.0602952	0.222346	0.271178	24	16	8
Malaysia	SSP2-RCP4.5	8.31974	4.38124	14.5024	4.85507	4.93186	4.0805	0.0975052	0.241342	0.404013	17	12	20
Mexico	SSP2-RCP4.5	12.4506	95.758	21.0492	6.82928	100.247	90.7221	0.114227	0.46461	0.245855	2	18	1
Rest of Central America	SSP2-RCP4.5	6.17896	13.7169	10.7558	3.58563	27.7958	3.04469	0.0888394	0.264152	0.336319	14	14	24
Rest of East Asia	SSP2-RCP4.5	-0.143164	10.09	-0.111619	-0.180877	10.9784	8.71959	0.0632477	0.25529	0.247748	15	17	12
Rest of Europe	SSP2-RCP4.5	-2.82857	-1.90492	-1.65819	-4.093	31.8288	-27.2936	0.0523773	0.225982	0.231776	22	19	13
Rest of North Africa	SSP2-RCP4.5	11.0917	8.46307	18.3516	6.28297	11.9714	3.02436	0.108726	0.251315	0.432628	16	10	21
Rest of Oceania	SSP2-RCP4.5	0.265588	45.8742	0.608198	0.0048723	56.386	41.6136	0.0649023	0.342725	0.189372	7	22	5
Rest of South America	SSP2-RCP4.5	17.7567	41.0311	32.6495	8.94956	52.2976	32.3601	0.135705	0.330891	0.410121	8	11	10
Rest of South Asia	SSP2-RCP4.5	13.0509	-0.0255296	22.7604	7.49187	1.26002	-1.99511	0.116657	0.230574	0.505941	20	8	17
Rest of Southeast Asia	SSP2-RCP4.5	22.4326	2.88814	37.3869	13.8039	3.57114	1.52419	0.154633	0.237693	0.650559	19	6	16
Rest of Sub-Saharan Africa	SSP2-RCP4.5	39.1304	4.32278	72.0714	22.2629	18.7072	-33.7241	0.222226	0.241199	0.921338	18	4	18
Rest of the World	SSP2-RCP4.5
Rest of Western Asia	SSP2-RCP4.5	96.1533	-4.51691	173.466	51.3224	3.50979	-25.3991	0.453052	0.2196	2.06308	25	1	25
Russian Federation	SSP2-RCP4.5	-10.9796	58.8967	-7.7285	-14.6733	94.1751	25.0705	0.019382	0.374544	0.0517484	6	25	6
Switzerland	SSP2-RCP4.5	-1.044	93.257	-0.559576	-1.56999	111.191	86.1663	0.0596011	0.458499	0.129992	3	23	3
Thailand	SSP2-RCP4.5	8.43547	-13.9551	15.5038	4.80851	-10.418	-19.0407	0.0979737	0.196539	0.498495	26	9	26
United Arab Emirates	SSP2-RCP4.5	24.4041	15.4581	45.9306	13.8566	30.3206	10.1668	0.162614	0.268407	0.60585	12	7	15
United States of America	SSP2-RCP4.5	50.5951	18.4154	119.368	2.86523	21.4621	17.086	0.268634	0.275632	0.974611	11	3	14
Australia	SSP2-RCP6.0	5.14142	29.094	9.29287	2.10382	34.7467	23.7124	0.0846395	0.301724	0.280519	9	15	12
Brazil	SSP2-RCP6.0	24.2406	89.5315	41.2175	14.0082	115.052	67.6726	0.161952	0.449396	0.360377	4	13	3
Canada	SSP2-RCP6.0	-8.21768	26.9335	-5.4529	-11.0119	31.3921	23.6156	0.0305623	0.296445	0.103096	10	24	11
Central Asia	SSP2-RCP6.0	-0.655159	15.1036	0.293526	-1.45645	17.8051	12.3172	0.0611751	0.26754	0.228658	13	20	22
China	SSP2-RCP6.0	24.0765	-1.80968	50.0192	4.33163	1.24675	-4.09475	0.161288	0.226215	0.712986	22	5	25
European Union	SSP2-RCP6.0	-13.7649	95.0973	9.68075	-34.3007	113.222	81.9964	0.00810721	0.462996	0.0175103	1	26	1
India	SSP2-RCP6.0	85.3579	-3.1439	157.129	49.4788	-1.09755	-4.34374	0.409353	0.222955	1.83604	23	2	24
Japan	SSP2-RCP6.0	5.4755	85.3454	12.466	0.258349	100.698	75.4534	0.0859918	0.439168	0.195806	5	21	4
Korea, Republic of	SSP2-RCP6.0	-1.00852	-6.93947	0.957381	-2.78421	1.37055	-11.4676	0.0597448	0.213681	0.279598	25	16	10
Malaysia	SSP2-RCP6.0	7.89858	4.44452	13.5452	4.66078	6.02713	3.22594	0.0958003	0.241496	0.396695	18	11	21
Mexico	SSP2-RCP6.0	11.8963	94.126	20.169	6.47724	100.247	90.7221	0.111983	0.460622	0.243112	2	18	5
Rest of Central America	SSP2-RCP6.0	5.58362	14.3339	9.54111	3.28787	27.7958	3.04469	0.0864295	0.26566	0.325339	14	14	9
Rest of East Asia	SSP2-RCP6.0	-0.147181	9.33803	-0.115289	-0.184078	9.97472	8.71959	0.0632314	0.253453	0.24948	15	17	13
Rest of Europe	SSP2-RCP6.0	-2.7516	-0.108741	-1.63886	-3.91588	31.8288	-27.2936	0.0526888	0.230371	0.228713	20	19	17
Rest of North Africa	SSP2-RCP6.0	11.1021	8.42839	19.5963	6.14254	11.0156	3.02436	0.108768	0.25123	0.432942	16	10	19
Rest of Oceania	SSP2-RCP6.0	0.257763	44.5889	0.6009	0.000473676	55.3974	37.9059	0.0648706	0.339584	0.19103	7	22	6
Rest of South America	SSP2-RCP6.0	16.4006	41.2979	28.9828	8.38988	52.2976	32.3601	0.130216	0.331543	0.392758	8	12	8
Rest of South Asia	SSP2-RCP6.0	12.7928	-1.10351	23.4033	7.33551	1.05734	-2.37274	0.115612	0.22794	0.507204	21	8	20
Rest of Southeast Asia	SSP2-RCP6.0	21.0319	2.14679	34.6369	12.9974	3.16782	1.52419	0.148963	0.235882	0.631517	19	6	18
Rest of Sub-Saharan Africa	SSP2-RCP6.0	37.5414	4.52107	67.8633	21.4254	17.4792	-33.7241	0.215793	0.241683	0.892877	17	4	16
Rest of the World	SSP2-RCP6.0
Rest of Western Asia	SSP2-RCP6.0	95.7534	-4.43586	180.835	50.6198	2.82214	-25.3991	0.451433	0.219798	2.05386	24	1	23
Russian Federation	SSP2-RCP6.0	-11.1416	56.0453	-7.99141	-14.449	94.1751	25.0705	0.0187265	0.367576	0.0509458	6	25	7
Switzerland	SSP2-RCP6.0	-1.03019	91.0463	-0.566168	-1.51691	109.632	78.5769	0.059657	0.453097	0.131665	3	23	2
Thailand	SSP2-RCP6.0	7.60397	-15.2139	13.6369	4.40992	-12.4048	-19.0407	0.0946078	0.193463	0.489023	26	9	26
United Arab Emirates	SSP2-RCP6.0	24.6044	15.1444	47.9548	13.8117	30.3206	10.1668	0.163425	0.26764	0.610614	12	7	14
United States of America	SSP2-RCP6.0	47.8216	18.0457	118.302	0.563405	21.2198	15.7134	0.257407	0.274729	0.936949	11	3	15
Australia	SSP3-RCP4.5	3.82825	30.0387	6.85234	1.53562	33.1973	27.8319	0.0793238	0.304033	0.260906	7	18	13
Brazil	SSP3-RCP4.5	50.7432	-17.3592	85.1258	29.8976	-17.3592	-17.3592	0.269234	0.188221	1.43041	23	4	4
Canada	SSP3-RCP4.5	-5.34498	26.4	-3.46346	-7.34867	28.4737	25.2655	0.0421909	0.295142	0.142951	8	23	12
Central Asia	SSP3-RCP4.5	-0.66001	24.0616	0.808794	-1.84949	36.9173	11.2059	0.0611555	0.289428	0.211298	9	20	19
China	SSP3-RCP4.5	39.8311	0.0354413	82.9162	9.10373	0.0354413	0.0354413	0.225062	0.230723	0.975463	17	6	24
European Union	SSP3-RCP4.5	-11.2352	94.4413	8.97322	-29.7192	102.304	90.4349	0.0183474	0.461393	0.0397653	3	25	1
India	SSP3-RCP4.5	231.27	-1.49533	410.273	133.577	-1.49533	-1.49533	1	0.226983	3	20	1	23
Japan	SSP3-RCP4.5	5.05787	83.6156	11.3049	0.408107	89.8351	79.8555	0.0843013	0.434941	0.193822	5	22	3
Korea, Republic of	SSP3-RCP4.5	-0.777646	-0.180207	0.906265	-2.32803	-0.180207	-0.180207	0.0606793	0.230196	0.263598	18	17	10
Malaysia	SSP3-RCP4.5	14.7023	2.13166	24.742	8.73044	2.13166	2.13166	0.123342	0.235845	0.522977	16	15	15
Mexico	SSP3-RCP4.5	28.9744	160.318	48.0252	15.4434	160.318	160.318	0.181114	0.622355	0.291015	1	16	5
Rest of Central America	SSP3-RCP4.5	13.6967	-41.063	23.636	7.77853	-41.063	-41.063	0.119271	0.130304	0.915331	25	7	9
Rest of East Asia	SSP3-RCP4.5	-0.207523	8.20527	-0.163974	-0.259898	8.20527	8.20527	0.0629872	0.250685	0.25126	12	19	11
Rest of Europe	SSP3-RCP4.5	-2.60712	-62.4777	-1.40745	-3.89465	15.1053	-140.061	0.0532737	0.0779795	0.683175	26	11	22
Rest of North Africa	SSP3-RCP4.5	22.2263	3.31547	37.64	12.019	7.9931	-1.36217	0.153798	0.238737	0.644215	14	12	21
Rest of Oceania	SSP3-RCP4.5	0.497415	42.4953	0.982856	0.161405	46.7605	39.9408	0.0658407	0.334469	0.196852	6	21	7
Rest of South America	SSP3-RCP4.5	33.3748	3.61848	62.1643	16.7537	3.61848	3.61848	0.198927	0.239478	0.830671	13	9	8
Rest of South Asia	SSP3-RCP4.5	34.4898	-0.608526	59.0382	19.0065	-0.608526	-0.608526	0.203441	0.22915	0.887806	19	8	18
Rest of Southeast Asia	SSP3-RCP4.5	44.9289	2.16323	74.986	25.911	2.16323	2.16323	0.245698	0.235922	1.04144	15	5	14
Rest of Sub-Saharan Africa	SSP3-RCP4.5	97.6604	-19.6077	178.144	52.3574	11.8431	-51.0585	0.459153	0.182727	2.51278	24	3	20
Rest of the World	SSP3-RCP4.5
Rest of Western Asia	SSP3-RCP4.5	149.759	-16.4361	276.514	78.4924	0.215791	-33.088	0.670045	0.190477	3	22	1	25
Russian Federation	SSP3-RCP4.5	-12.9521	145.636	-9.23577	-17.0886	261.515	29.7572	0.0113975	0.586481	0.0194337	2	26	6
Switzerland	SSP3-RCP4.5	-0.847958	89.2216	-0.453566	-1.27335	96.8946	84.9849	0.0603947	0.448639	0.134618	4	24	2
Thailand	SSP3-RCP4.5	15.3957	-10.2714	27.557	8.8078	-10.2714	-10.2714	0.126148	0.20554	0.613742	21	14	26
United Arab Emirates	SSP3-RCP4.5	28.8131	21.5396	55.3228	15.9295	34.3626	8.71651	0.180462	0.283266	0.637075	10	13	16
United States of America	SSP3-RCP4.5	35.9491	17.882	83.7521	1.33733	19.291	17.1149	0.209348	0.274329	0.763127	11	10	17
Australia	SSP3-RCP6.0	3.83168	28.6608	6.75879	1.52015	32.9171	23.9784	0.0793377	0.300666	0.263873	7	17	17
Brazil	SSP3-RCP6.0	49.9769	-87.0752	82.3784	29.4342	-87.0752	-87.0752	0.266132	0.0178784	3	26	1	1
Canada	SSP3-RCP6.0	-5.54569	25.1839	-3.63865	-7.48914	28.2034	21.8875	0.0413785	0.29217	0.141624	8	23	14
Central Asia	SSP3-RCP6.0	-0.707539	19.4258	0.748535	-1.84965	27.6457	11.2059	0.0609631	0.278101	0.219212	9	20	23
China	SSP3-RCP6.0	37.5855	-0.560042	81.7703	7.21301	-0.560042	-0.560042	0.215972	0.229268	0.942007	18	8	25
European Union	SSP3-RCP6.0	-11.2771	89.8245	8.66827	-28.6962	101.377	77.5117	0.0181777	0.450112	0.0403849	3	25	2
India	SSP3-RCP6.0	222.032	-2.42229	388.847	130.305	-2.42229	-2.42229	0.962605	0.224718	3	20	1	24
Japan	SSP3-RCP6.0	4.8069	79.4922	11.0138	0.2108	89.0179	69.6034	0.0832853	0.424866	0.196027	5	22	5
Korea, Republic of	SSP3-RCP6.0	-0.897041	-3.17499	0.778984	-2.47291	-3.17499	-3.17499	0.060196	0.222879	0.270084	21	16	11
Malaysia	SSP3-RCP6.0	14.0809	1.20166	23.13	8.43549	1.20166	1.20166	0.120826	0.233573	0.517296	15	14	20
Mexico	SSP3-RCP6.0	27.9527	228.26	46.2265	15.0042	228.26	228.26	0.176979	0.788364	0.224489	1	19	4
Rest of Central America	SSP3-RCP6.0	12.4189	-79.2682	20.9112	7.17197	-79.2682	-79.2682	0.114098	0.0369539	3	25	1	7
Rest of East Asia	SSP3-RCP6.0	-0.213875	6.56924	-0.16976	-0.262881	6.56924	6.56924	0.0629614	0.246688	0.255227	14	18	15
Rest of Europe	SSP3-RCP6.0	-2.54437	-39.8671	-1.38487	-3.72122	15.1053	-94.8394	0.0535277	0.133226	0.401781	24	15	10
Rest of North Africa	SSP3-RCP6.0	22.7515	6.94459	39.8596	11.9527	6.94459	6.94459	0.155925	0.247605	0.629732	12	12	16
Rest of Oceania	SSP3-RCP6.0	0.483285	39.4503	0.979951	0.150661	46.1142	32.2958	0.0657835	0.327029	0.201155	6	21	9
Rest of South America	SSP3-RCP6.0	31.1294	-18.2233	55.6859	15.79	-18.2233	-18.2233	0.189838	0.18611	1.02003	23	6	6
Rest of South Asia	SSP3-RCP6.0	34.4337	-2.00554	60.9772	19.0576	-2.00554	-2.00554	0.203214	0.225736	0.900226	19	9	22
Rest of Southeast Asia	SSP3-RCP6.0	42.6768	0.948372	70.3227	24.6314	0.948372	0.948372	0.236581	0.232954	1.01557	16	7	19
Rest of Sub-Saharan Africa	SSP3-RCP6.0	94.8261	10.8954	168.131	51.022	10.8954	10.8954	0.44768	0.257258	1.7402	11	5	13
Rest of the World	SSP3-RCP6.0
Rest of Western Asia	SSP3-RCP6.0	149.858	-0.228168	289.306	77.3744	-0.228168	-0.228168	0.670448	0.230079	2.91399	17	4	18
Russian Federation	SSP3-RCP6.0	-13.069	108.867	-9.5143	-16.7382	187.978	29.7572	0.0109243	0.496641	0.0219964	2	26	8
Switzerland	SSP3-RCP6.0	-0.84103	84.1798	-0.458321	-1.23436	95.8694	71.685	0.0604227	0.43632	0.138483	4	24	3
Thailand	SSP3-RCP6.0	13.9389	-10.7541	24.1288	8.16312	-10.7541	-10.7541	0.120252	0.20436	0.588429	22	13	26
United Arab Emirates	SSP3-RCP6.0	29.2501	6.72494	59.0211	16.0189	6.72494	6.72494	0.18223	0.247068	0.737572	13	10	12
United States of America	SSP3-RCP6.0	33.7756	17.035	81.4761	-0.0318426	19.1179	14.7471	0.20055	0.27226	0.736611	10	11	21
Australia	SSP4-RCP4.5	3.87805	27.7672	6.9148	1.59778	38.9105	21.125	0.0795254	0.298482	0.266432	7	14	14
Brazil	SSP4-RCP4.5	19.7217	-94.3923	33.4085	11.5336	121.866	-679.385	0.14366					5
Canada	SSP4-RCP4.5	-6.67002	26.8238	-4.35591	-9.13243	34.7052	21.1837	0.0368272	0.296177	0.124342	8	22	12
Central Asia	SSP4-RCP4.5	-0.496868	13.8615	0.275862	-1.17546	16.237	10.7667	0.0618159	0.264505	0.233704	13	16	21
China	SSP4-RCP4.5	21.4891	5.39932	43.2219	4.62765	9.83933	0.959304	0.150814	0.243829	0.618525	19	9	25
European Union	SSP4-RCP4.5	-11.5337	94.1379	8.40218	-30.1525	123.887	69.0327	0.017139	0.460651	0.037206	2	25	1
India	SSP4-RCP4.5	81.0068	3.50396	146.778	46.4857	7.93507	-0.92716	0.39174	0.239198	1.63772	21	4	23
Japan	SSP4-RCP4.5	4.38207	85.7143	9.67983	0.30615	108.662	63.4433	0.0815657	0.440069	0.185347	4	20	3
Korea, Republic of	SSP4-RCP4.5	-0.780926	17.1743	0.884605	-2.33448	32.7273	1.62121	0.060666	0.2726	0.222546	10	17	10
Malaysia	SSP4-RCP4.5	6.72733	4.6154	11.6183	3.99649	5.20749	4.02331	0.0910592	0.241914	0.376412	20	13	16
Mexico	SSP4-RCP4.5	10.049	314.876	16.9351	5.55568	987.316	82.2785	0.104505	1	0.104505	1	23	4
Rest of Central America	SSP4-RCP4.5	8.73006	-93.4942	15.0927	4.99796	33.4284	-436.83	0.0991662	0.00219452	3	25	1	13
Rest of East Asia	SSP4-RCP4.5	-0.123434	15.2092	-0.0962013	-0.156429	19.0113	11.407	0.0633275	0.267798	0.236475	12	15	11
Rest of Europe	SSP4-RCP4.5	-2.31279	16.9037	-1.34453	-3.38737	31.4241	-7.48335	0.0544651	0.271939	0.200285	11	18	9
Rest of North Africa	SSP4-RCP4.5	9.52557	8.72339	15.5003	5.38164	11.3422	5.21109	0.102386	0.251951	0.406374	16	12	22
Rest of Oceania	SSP4-RCP4.5	0.505577	45.2029	1.01308	0.16118	61.696	30.0814	0.0658738	0.341084	0.19313	5	19	7
Rest of South America	SSP4-RCP4.5	16.0987	-12.5791	29.3385	8.2495	56.1631	-188.374	0.128994	0.199901	0.64529	24	8	8
Rest of South Asia	SSP4-RCP4.5	34.0285	7.0446	58.5909	19.2265	12.2529	1.83628	0.201573	0.247849	0.813291	18	5	19
Rest of Southeast Asia	SSP4-RCP4.5	29.6987	7.64149	48.5546	18.0808	11.237	4.046	0.184047	0.249308	0.738231	17	7	15
Rest of Sub-Saharan Africa	SSP4-RCP4.5	109.401	11.3665	200.144	60.2482	17.4984	2.54949	0.506679	0.258409	1.96076	14	3	20
Rest of the World	SSP4-RCP4.5
Rest of Western Asia	SSP4-RCP4.5	113.919	-0.776456	205.907	60.5911	2.6911	-5.11923	0.524968	0.228739	2.29505	22	2	24
Russian Federation	SSP4-RCP4.5	-9.23518	38.3787	-6.45463	-12.3745	56.686	12.9806	0.0264435	0.32441	0.0815126	6	24	6
Switzerland	SSP4-RCP4.5	-0.911308	90.7468	-0.485519	-1.37826	119.973	64.4651	0.0601383	0.452366	0.132942	3	21	2
Thailand	SSP4-RCP4.5	7.37305	-7.43249	13.2378	4.29428	-0.817961	-14.047	0.093673	0.212476	0.440864	23	11	26
United Arab Emirates	SSP4-RCP4.5	20.1134	11.2937	37.3903	11.5236	13.5137	8.5263	0.145245	0.258231	0.562462	15	10	17
United States of America	SSP4-RCP4.5	36.8903	17.8984	87.1368	1.19277	23.1514	13.6883	0.213158	0.274369	0.776902	9	6	18
Australia	SSP4-RCP6.0	3.86781	29.5242	6.87616	1.58649	37.5776	23.7323	0.0794839	0.302775	0.262518	9	15	10
Brazil	SSP4-RCP6.0	19.2181	50.7079	32.0866	11.289	121.866	-57.6614	0.141622	0.354535	0.399457	5	13	5
Canada	SSP4-RCP6.0	-6.9256	28.4111	-4.56467	-9.34356	33.8704	24.4572	0.0357926	0.300056	0.119287	10	24	9
Central Asia	SSP4-RCP6.0	-0.533231	14.9306	0.222764	-1.1828	16.237	13.4834	0.0616687	0.267118	0.230867	14	17	14
China	SSP4-RCP6.0	20.2405	5.38413	41.6709	3.45268	9.80896	0.959304	0.14576	0.243792	0.597887	21	7	24
European Union	SSP4-RCP6.0	-11.6133	101.32	7.88534	-29.0806	120.489	89.1614	0.0168169	0.478199	0.0351672	2	26	1
India	SSP4-RCP6.0	77.173	3.48524	137.724	44.7145	7.89764	-0.92716	0.376221	0.239152	1.57314	23	3	23
Japan	SSP4-RCP6.0	4.21112	92.1281	9.36749	0.164814	105.776	83.9184	0.0808737	0.455741	0.177455	4	21	4
Korea, Republic of	SSP4-RCP6.0	-0.890776	17.1134	0.820512	-2.46803	32.6056	1.62121	0.0602214	0.272451	0.221036	12	18	12
Malaysia	SSP4-RCP6.0	6.42463	4.58401	10.8278	3.8012	5.14471	4.02331	0.0898339	0.241837	0.371465	22	14	19
Mexico	SSP4-RCP6.0	9.61972	143.656	16.2168	5.31464	241.177	94.7209	0.102767	0.581642	0.176685	1	22	3
Rest of Central America	SSP4-RCP6.0	7.88802	-7.34586	13.2049	4.60808	33.4286	-69.0184	0.0957576	0.212688	0.450226	25	9	15
Rest of East Asia	SSP4-RCP6.0	-0.127351	15.1731	-0.0991037	-0.159852	18.9392	11.407	0.0633117	0.26771	0.236493	13	16	11
Rest of Europe	SSP4-RCP6.0	-2.26689	13.669	-1.33844	-3.26224	30.831	-7.48335	0.0546509	0.264035	0.206983	15	19	20
Rest of North Africa	SSP4-RCP6.0	9.4721	9.34253	16.3059	5.28475	11.6124	5.07297	0.10217	0.253464	0.403095	18	12	22
Rest of Oceania	SSP4-RCP6.0	0.492952	49.6108	1.01029	0.155232	59.9103	43.0273	0.0658227	0.351855	0.187073	6	20	7
Rest of South America	SSP4-RCP6.0	14.8964	30.5097	26.1282	7.6939	56.1631	-5.71652	0.124127	0.305183	0.406731	8	11	8
Rest of South Asia	SSP4-RCP6.0	34.2378	7.01094	60.7425	19.1451	12.1856	1.83628	0.202421	0.247767	0.81698	20	4	21
Rest of Southeast Asia	SSP4-RCP6.0	28.3313	7.6114	46.2292	17.3718	11.1768	4.046	0.178511	0.249234	0.71624	19	6	18
Rest of Sub-Saharan Africa	SSP4-RCP6.0	105.679	12.1902	188.985	58.6134	17.4984	2.16924	0.49161	0.260422	1.88774	17	2	17
Rest of the World	SSP4-RCP6.0
Rest of Western Asia	SSP4-RCP6.0	113.41	-0.124668	212.951	59.6121	2.69093	-5.32568	0.522908	0.230332	2.27024	24	1	25
Russian Federation	SSP4-RCP6.0	-9.33712	46.1251	-6.65314	-12.2166	56.686	36.0981	0.0260309	0.343338	0.0758171	7	25	6
Switzerland	SSP4-RCP6.0	-0.899382	98.3767	-0.494705	-1.32597	116.761	86.8267	0.0601865	0.471008	0.127782	3	23	2
Thailand	SSP4-RCP6.0	6.69016	-7.44979	11.6471	3.94587	-0.85256	-14.047	0.0909087	0.212434	0.427939	26	10	26
United Arab Emirates	SSP4-RCP6.0	20.3083	12.6178	39.2288	11.4706	13.5137	11.3361	0.146035	0.261467	0.558521	16	8	16
United States of America	SSP4-RCP6.0	34.9583	19.0852	84.9336	-0.179155	22.5292	16.8325	0.205337	0.277269	0.74057	11	5	13
Australia	SSP5-RCP4.5	5.35463	26.0521	9.48491	2.21508	32.155	21.7584	0.0855026	0.294292	0.290537	7	16	16
Brazil	SSP5-RCP4.5	13.7016	24.064	22.4192	8.34431	112.918	-68.1244	0.119291	0.289434	0.412152	9	11	6
Canada	SSP5-RCP4.5	-9.01942	24.218	-5.86953	-12.3187	30.3263	20.2388	0.0273169	0.28981	0.0942579	8	24	13
Central Asia	SSP5-RCP4.5	-0.486925	15.6806	0.126507	-1.04874	20.0399	12.2288	0.0618561	0.26895	0.229991	12	19	22
China	SSP5-RCP4.5	18.5962	-7.07694	36.9703	3.83893	6.95416	-32.2686	0.139104	0.213345	0.652015	21	5	25
European Union	SSP5-RCP4.5	-15.7677	85.7419	9.63896	-39.415	110.021	72.527		0.440137		2		1
India	SSP5-RCP4.5	47.5399	-6.96227	80.7442	28.9458	5.55453	-24.9665	0.256267	0.213625	1.19961	20	2	23
Japan	SSP5-RCP4.5	5.42102	77.6369	11.8923	0.409268	100.023	66.183	0.0857713	0.420333	0.204056	4	20	3
Korea, Republic of	SSP5-RCP4.5	-0.928058	-22.4542	1.14551	-2.85514	24.1603	-96.4295	0.0600705	0.175772	0.341752	26	15	8
Malaysia	SSP5-RCP4.5	5.21497	5.47742	8.89383	3.18019	17.3618	-1.5952	0.0849372	0.24402	0.348075	15	14	17
Mexico	SSP5-RCP4.5	6.79907	131.784	11.068	3.86276	190.473	82.0392	0.0913496	0.552634	0.165299	1	22	4
Rest of Central America	SSP5-RCP4.5	3.40934	-19.1646	5.73103	2.06521	25.809	-64.6912	0.0776281	0.18381	0.422328	23	9	15
Rest of East Asia	SSP5-RCP4.5	-0.102926	7.23983	-0.0797271	-0.130254	16.7684	1.21405	0.0634106	0.248326	0.255352	14	18	10
Rest of Europe	SSP5-RCP4.5	-2.95396	-19.4221	-1.82688	-4.18934	-3.52824	-42.2794	0.0518697	0.183181	0.283161	24	17	7
Rest of North Africa	SSP5-RCP4.5	6.76664	4.87865	10.76	3.93037	9.40239	1.56704	0.0912183	0.242557	0.37607	16	13	20
Rest of Oceania	SSP5-RCP4.5	0.156002	38.2793	0.434117	-0.0746527	54.585	29.3681	0.0644587	0.324167	0.198844	6	21	9
Rest of South America	SSP5-RCP4.5	10.0403	18.234	18.5227	5.19343	50.2898	-13.0254	0.10447	0.275189	0.379629	10	12	11
Rest of South Asia	SSP5-RCP4.5	6.80605	-5.30085	11.0243	4.10284	9.03059	-23.3658	0.0913778	0.217684	0.419772	19	10	14
Rest of Southeast Asia	SSP5-RCP4.5	13.0497	-0.270524	20.3709	8.27284	9.20059	-9.70528	0.116652	0.229976	0.507237	17	7	12
Rest of Sub-Saharan Africa	SSP5-RCP4.5	20.5773	-2.42313	35.0035	12.2004	15.7917	-32.1104	0.147123	0.224716	0.654708	18	4	19
Rest of the World	SSP5-RCP4.5
Rest of Western Asia	SSP5-RCP4.5	66.096	-7.81469	117.123	35.3136	1.80062	-24.9551	0.331381	0.211542	1.5665	22	1	26
Russian Federation	SSP5-RCP4.5	-8.76161	65.5037	-6.10552	-11.7652	84.0271	51.1581	0.0283605	0.390687	0.0725914	5	25	5
Switzerland	SSP5-RCP4.5	-1.16167	80.7223	-0.613121	-1.75392	107.28	66.5495	0.0591248	0.427872	0.138183	3	23	2
Thailand	SSP5-RCP4.5	5.75359	-20.3676	10.3602	3.45912	-3.20611	-44.0165	0.0871175	0.180871	0.481656	25	8	24
United Arab Emirates	SSP5-RCP4.5	19.3389	13.2303	35.2364	10.9618	28.2262	6.99551	0.14211	0.262963	0.54042	13	6	18
United States of America	SSP5-RCP4.5	52.0354	16.2519	120.396	3.23571	20.5602	13.8278	0.274465	0.270346	1.01523	11	3	21
Australia	SSP5-RCP6.0	5.33499	26.4522	9.38308	2.18501	32.7364	21.7584	0.085423	0.295269	0.289306	7	17	11
Brazil	SSP5-RCP6.0	13.2588	-3.50026	21.5014	8.08722	112.918	-68.1244	0.117498	0.222084	0.529072	17	7	8
Canada	SSP5-RCP6.0	-9.31309	24.1718	-6.14281	-12.5123	29.81	20.2388	0.0261282	0.289698	0.0901912	8	24	10
Central Asia	SSP5-RCP6.0	-0.817721	16.8168	0.0790788	-1.05744	21.4151	12.2288	0.0605171	0.271726	0.222713	9	19	21
China	SSP5-RCP6.0	17.3044	-11.2974	35.4149	2.81058	3.83951	-32.2686	0.133875	0.203033	0.659376	22	4	19
European Union	SSP5-RCP6.0	-15.6334	85.6433	9.13817	-37.8212	107.594	72.527	0.000543958	0.439896	0.00123656	2	26	2
India	SSP5-RCP6.0	45.3064	-10.0875	75.2062	27.9426	1.29672	-24.9665	0.247226	0.205989	1.20019	21	2	20
Japan	SSP5-RCP6.0	5.18175	77.0413	11.5565	0.269396	96.6115	66.183	0.0848027	0.418878	0.202452	4	20	4
Korea, Republic of	SSP5-RCP6.0	-1.08779	-34.8507	1.02416	-3.00736	10.7379	-96.4295	0.0594239	0.145483	0.40846	26	12	6
Malaysia	SSP5-RCP6.0	4.94308	6.67671	8.25309	3.04417	17.3618	-1.5952	0.0838366	0.24695	0.339488	13	15	17
Mexico	SSP5-RCP6.0	6.44316	154.195	10.4194	3.63517	190.473	83.5733	0.0899089	0.607395	0.148024	1	22	1
Rest of Central America	SSP5-RCP6.0	2.66183	-34.1416	5.0988	1.902	25.8092	-64.6912	0.0746022	0.147216	0.506755	25	8	26
Rest of East Asia	SSP5-RCP6.0	-0.105926	5.41603	-0.0819564	-0.133291	11.3617	1.21405	0.0633984	0.24387	0.259968	14	18	9
Rest of Europe	SSP5-RCP6.0	-2.81243	-27.7436	-1.79578	-4.00065	-3.52824	-49.9545	0.0524426	0.162848	0.322033	24	16	15
Rest of North Africa	SSP5-RCP6.0	5.66189	4.0453	11.1158	3.83745	9.40239	-0.0166699	0.0867463	0.240521	0.360661	15	14	24
Rest of Oceania	SSP5-RCP6.0	0.0026153	37.7706	0.42489	-0.0757358	52.073	29.3681	0.0638378	0.322925	0.197686	6	21	5
Rest of South America	SSP5-RCP6.0	9.17242	9.10073	16.2353	4.82471	50.29	-13.0254	0.100957	0.252873	0.399239	12	13	14
Rest of South Asia	SSP5-RCP6.0	6.61948	-8.82051	10.878	4.00519	2.37467	-23.3658	0.0906226	0.209085	0.433426	19	11	12
Rest of Southeast Asia	SSP5-RCP6.0	12.2314	-2.29146	18.9485	7.83308	4.46411	-9.70528	0.113339	0.225038	0.503647	16	9	13
Rest of Sub-Saharan Africa	SSP5-RCP6.0	15.7541	-6.78781	32.6601	11.6476	15.7917	-32.1104	0.127599	0.214051	0.596114	18	5	22
Rest of the World	SSP5-RCP6.0
Rest of Western Asia	SSP5-RCP6.0	64.3788	-10.039	121.946	34.9199	1.80062	-24.9551	0.32443	0.206107	1.57408	20	1	25
Russian Federation	SSP5-RCP6.0	-8.87902	76.9128	-6.29405	-11.7062	119.316	51.1581	0.0278852	0.418564	0.0666212	5	25	7
Switzerland	SSP5-RCP6.0	-1.14995	80.3168	-0.62299	-1.6947	104.045	66.5495	0.0591723	0.426881	0.138615	3	23	3
Thailand	SSP5-RCP6.0	5.17147	-23.9456	8.89488	3.155	-5.68135	-44.0165	0.0847611	0.172128	0.49243	23	10	23
United Arab Emirates	SSP5-RCP6.0	19.4683	14.74	37.2653	11.0838	28.2262	9.46046	0.142634	0.266652	0.534908	11	6	18
United States of America	SSP5-RCP6.0	48.5051	16.2429	116.472	0.845239	20.1961	13.8278	0.260174	0.270324	0.962454	10	3	16
