# Supplementary material for: Contrasting Suitability and Ambition in Regional Carbon Mitigation
Source: Research Square preprint supplement (doi:10.21203/rs.3.rs-242383/v1), 2021-03-16
Supplement: Supplementary file 5 [file dbfda2f5dc8966ed84c867dd.xlsx]

## Sheet: Scenario with 10% transferred
GDP change (Million US$)	Average	AIMCGE	GCAM4	REMIND	IMAGE	WITCH		RCC (US$ per tCO2)	Average	AIMCGE	GCAM4	REMIND	IMAGE	WITCH
Australia	-11.8628	-10.4749	-10.0675	-8.9764	-10.6349	-19.1603		Australia	30.0264	32.5381	26.7496	28.5123	26.9919	35.3402
Brazil	-11.2441	-11.7952	-6.26015	-8.04877	-8.2663	-21.8501		Brazil	88.7359		115.16	68.0148	83.0332
Canada	-8.34452	-7.52755	-7.11728	-6.59998	-7.49187	-12.9859		Canada	27.5894	27.9961	25.923	26.1094	26.0579	31.8607
Central Asia	14.0704	12.2486	12.5678	11.1577	13.2588	21.1193		Central Asia	14.8333	16.7695	16.5629	12.0792	14.1814	14.5736
China	-585.707	-462.073	-555.129	-416.011	-603.366	-891.954		China	0.927422		-0.72513		2.23393	1.27346
European Union	4993.81	4334.46	4357.16	3758.64	4586.55	7932.23		European Union	90.0907	94.0292	82.4757	84.4395	83.8318	105.677
India	-20.8696	-19.1581	-18.1369	-16.8093	-18.8926	-31.3515		India	-1.933		-4.09912		-0.891043	-0.808832
Japan	-30.0865	-28.1285	-27.4851	-25.3249	-28.5422	-40.9518		Japan	87.4492	88.0755	82.3806	80.8996	83.3826	102.508
Korea, Republic of	-21.658	-19.8713	-18.9822	-17.5567	-19.6031	-32.2767		Korea, Republic of	-2.39098		-9.74011		1.85669	0.710495
Malaysia	2.37281	2.04553	2.16725	1.86633	2.29911	3.48585		Malaysia	4.14437		3.84509		3.93339	4.65462
Mexico	25.3392	22.0764	23.491	19.9998	24.0881	37.0406		Mexico	95.0714		90.2894	99.3331	95.5916
Rest of Central America	-1.33204	-1.66094	-0.00548167	-1.1073	-1.03603	-2.85047		Rest of Central America	13.7795		27.7961	3.16143	10.381
Rest of East Asia	-0.349858	-0.634458	-0.0543821	-0.571012	0.0725094	-0.561948		Rest of East Asia	10.0985		8.72299		10.5683	11.0041
Rest of Europe	-19.865	-24.2754	-19.6018	-9.57404	-16.9247	-28.949		Rest of Europe	-1.43076	-26.2487	-18.7796	31.9327	3.05886	2.8828
Rest of North Africa	6.72581	5.84947	6.26473	5.28385	6.57259	9.65842		Rest of North Africa	7.58578	-0.197153	10.5639	8.4467	11.8154	7.3
Rest of Oceania	-0.684502	-0.64533	-0.615198	-0.57	-0.637797	-0.954185		Rest of Oceania	45.9953	45.6077	42.6602	41.7336	43.4624	56.5128
Rest of South America	0.448061	-0.320043	2.11229	0.576078	1.42953	-1.55754		Rest of South America	41.0068		52.2713	32.3423	38.407
Rest of South Asia	1.63749	1.3312	1.60718	1.1905	1.7587	2.29984		Rest of South Asia	-0.195738		-2.17027		1.10807	0.474991
Rest of Southeast Asia	-0.345563	-0.659064	-0.0712501	-0.534376	0.0890627	-0.552189		Rest of Southeast Asia	2.89249		1.52649		3.56681	3.58417
Rest of Sub-Saharan Africa	6.61161	4.89942	7.11375	4.95173	7.81118	8.28194		Rest of Sub-Saharan Africa	3.85515	-35.3721	16.8655	11.4575	18.5939	7.73099
Rest of the World	-5.58891	-4.35877	-5.74401	-4.78862	-5.78746	-7.26569		Rest of the World
Rest of Western Asia	5.7929	4.11446	6.36762	4.11446	7.28194	7.08601		Rest of Western Asia	-4.65695	-25.8878	2.40399	-1.18995	3.47249	-2.08348
Russian Federation	337.754	297.029	304.788	278.913	321.787	486.255		Russian Federation	54.7484	86.8812	61.6489	23.3432	45.9366	55.9321
Switzerland	0.748681	0.16576	0.566346	0.110506	0.704479	2.19632		Switzerland	93.232	94.5535	86.2732	86.1614	88.0434	111.129
Thailand	-5.2828	-4.68198	-4.74667	-4.18467	-4.92862	-7.87204		Thailand	-13.5085		-18.5996		-12.0435	-9.88237
United Arab Emirates	0.407442	0.243666	0.459371	0.287606	0.515294	0.531272		United Arab Emirates	15.3523	29.9739	12.0781	10.1128	13.5588	11.0378
United States of America	-23.3159	-20.2973	-20.1238	-18.736	-19.9503	-37.4719		United States of America	18.4554	18.9173	17.1238	17.369	17.3558	21.511

## Sheet: Scenario with 50% transferred
GDP change (Million US$)	Average	AIMCGE	GCAM4	REMIND	IMAGE	WITCH		RCC (US$ per tCO2)	Average	AIMCGE	GCAM4	REMIND	IMAGE	WITCH
Australia	-49.5724	-44.3728	-42.6561	-38.8007	-44.2419	-77.7906		Australia	30.9229	33.4145	27.5969	29.3652	27.8389	36.3992
Brazil	-44.0193	-48.5343	-22.4544	-32.7027	-30.9865	-85.4185		Brazil	89.3868		115.438	69.0634	83.6593
Canada	-34.7801	-32.1437	-30.128	-28.1837	-31.0378	-52.4074		Canada	27.9989	28.4088	26.3109	26.5097	26.4427	32.3224
Central Asia	65.043	56.9004	58.4472	52.1265	61.5936	96.147		Central Asia	12.6783	12.9945	14.3106	11.2057	12.5853	12.2955
China	-2974.12	-2337.69	-2817.88	-2102.2	-3062.79	-4550.03		China	5.86315		4.47267		6.3334	6.78337
European Union	21946.6	19214.4	19356.3	16827	20324.8	34010.8		European Union	52.1142	64.2617	42.0264	49.992	42.6353	61.6558
India	-93.0495	-86.3544	-81.861	-76.6528	-84.2506	-136.129		India	-1.06863		-3.23962		-0.192186	0.225908
Japan	-134.971	-126.027	-124.924	-115.869	-128.739	-179.296		Japan	88.363	88.9876	83.2936	81.8328	84.2928	103.408
Korea, Republic of	-96.7681	-89.5901	-85.3138	-80.0779	-87.7695	-141.089		Korea, Republic of	1.05621		-6.31101		4.6504	4.82923
Malaysia	11.2717	9.72049	10.3155	8.9327	10.9884	16.4014		Malaysia	3.25753		2.96002		3.18514	3.62743
Mexico	117.538	103.062	109.279	93.8474	112.082	169.421		Mexico	92.5515		88.7091	95.9589	92.9864
Rest of Central America	-5.531	-7.25224	0.542685	-4.94446	-4.05095	-11.95		Rest of Central America	13.9753		27.7728	3.56601	10.587
Rest of East Asia	0.121453	-1.63146	1.30517	-1.47738	2.06652	0.34442		Rest of East Asia	10.0234		8.63808		10.4696	10.9626
Rest of Europe	-83.2987	-105.496	-84.4875	-39.5213	-70.013	-116.976		Rest of Europe	0.108414	-22.7527	-17.1579	32.2578	3.95134	4.24353
Rest of North Africa	32.1427	27.9729	29.8917	25.2594	31.6315	45.958		Rest of North Africa	4.26946	-12.3812	9.90492	6.99289	11.2207	5.61
Rest of Oceania	-2.88415	-2.72947	-2.64912	-2.47837	-2.69683	-3.86696		Rest of Oceania	46.3867	46.0044	43.0495	42.1353	43.8444	56.9001
Rest of South America	5.6541	0.96013	13.2071	5.05668	9.53729	-0.490733		Rest of South America	40.8606		52.1331	32.2039	38.2447
Rest of South Asia	8.7264	7.06727	8.47964	6.38544	9.1723	12.5274		Rest of South Asia	-0.930947		-2.91925		0.467538	-0.34113
Rest of Southeast Asia	0.117563	-1.72782	1.17563	-1.24688	1.87032	0.516564		Rest of Southeast Asia	2.85553		1.48632		3.52131	3.55895
Rest of Sub-Saharan Africa	35.3107	25.9966	37.1031	26.2232	40.7646	46.4661		Rest of Sub-Saharan Africa	1.83146	-42.47	16.3545	10.5117	18.1161	6.64498
Rest of the World	-5.58891	-4.35877	-5.74401	-4.78862	-5.78746	-7.26569		Rest of the World
Rest of Western Asia	32.243	24.0337	34.4504	23.3806	38.3037	41.0466		Rest of Western Asia	-5.32482	-28.2554	2.23494	-1.49257	3.31359	-2.42471
Russian Federation	1603.21	1412.44	1450.86	1330.96	1529.6	2292.19		Russian Federation	39.1972	59.4918	45.3078	16.8279	34.3526	40.0058
Switzerland	6.19112	3.06655	4.9866	2.32064	5.95354	14.6283		Switzerland	93.0407	94.4359	86.093	86.0623	87.8359	110.776
Thailand	-24.2614	-21.6633	-21.8897	-19.5083	-22.759	-35.4868		Thailand	-11.9132		-17.0064		-10.7298	-8.00329
United Arab Emirates	1.82151	1.08252	2.01724	1.32618	2.31283	2.36876		United Arab Emirates	14.9862	28.7818	11.966	9.91773	13.4487	10.8171
United States of America	-92.3613	-82.7505	-79.1074	-75.9847	-82.4035	-141.561		United States of America	18.5745	19.034	17.2346	17.4873	17.4696	21.6469
